# Supplementary material for: Direct catalytic hydrogenation of CO2 to formate over a Schiff-base-mediated gold nanocatalyst
Source: PubMed Central journal article supplement (PMC5680246; doi:10.1038/s41467-017-01673-3), 2017-11-10
Supplement: 41467_2017_1673_MOESM1_ESM.pdf [file 41467_2017_1673_MOESM1_ESM.pdf]

## Supplementary Methods

### Preparation of unfunctionalized Au/SiO<sub>2</sub> Catalyst

Firstly, Au/SiO<sub>2</sub>-NH<sub>2</sub> with a theory loading of 1.5 wt.% was prepared by the same synthetic procedure as described in the manuscript. Subsequently, the obtained gold catalyst (0.3 g) was redispersed in 400 mL ethanol solutions, to which 50 μL of TEOS and 1.0 mL of ammonium hydroxide solution (28 wt%) were added under continuous stirring. After stirring at room temperature for 6 h, the precipitate was filtered and washed with deionized water. Following drying in vacuum at 120 °C for 12 h, Au/SiO<sub>2</sub>-NH<sub>2</sub> catalyst was obtained. The achieved catalysts were then calcined at 800 °C for 20 s at O<sub>2</sub> atmosphere to obtain the unfunctionalized Au/SiO<sub>2</sub> catalyst.

### Calculations of turnover number (TON) and turnover frequency (TOF)

After ensuring that the hydrogenation is free of diffusion limitations (e.g. varying stirrer speed and catalyst mass, the selected stirrer speed is as high as 600 r/min and the catalyst was grinded before use), the TON and initial TOF reported here is calculated by the equation as follows:

$$TON = \frac{C_{HCOOH} \times V}{n_{Au}} \quad 1$$

$$TOF = \frac{C_{HCOOH} \times V}{n_{Au} t} \quad 2$$

Where  $C_{HCOOH}$  is the formate concentration monitored by HPLC,  $n_{Au}$  is the total mole number of Au atoms in catalyst,  $V$  is the volume of reactants, and  $t$  is the initial time of the catalytic reaction (where  $C_{HCOOH}$  is less than 0.05 M compared with the 1.5 M base added).

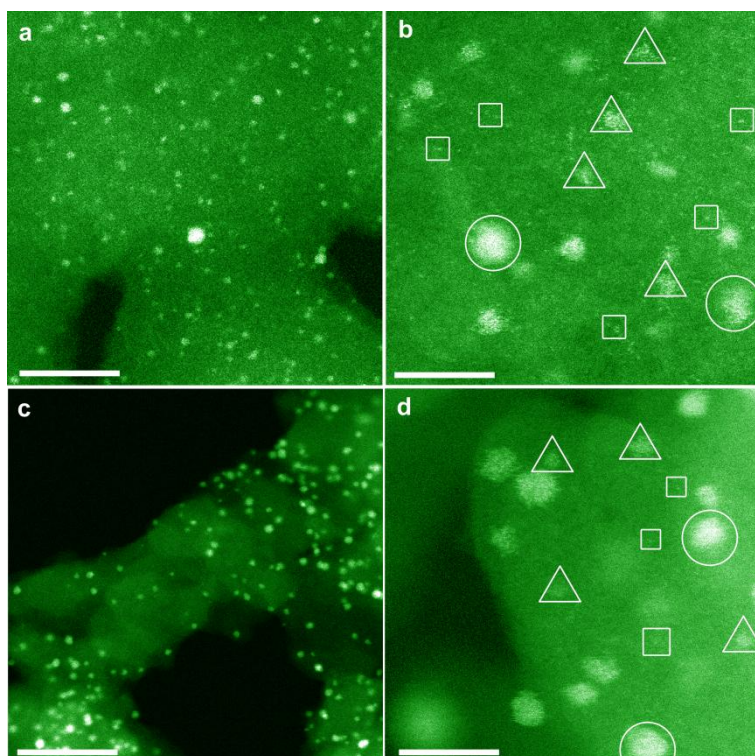

**Supplementary Figure 1.** (a) Typical aberration-corrected HAADF-STEM images of Au/SiO<sub>2</sub>-Schiff (a,b) and Au/SiO<sub>2</sub>-NH<sub>2</sub> (c,d). Scale bars in a,c represent 20 nm. Scale bars in b,d represent 5 nm. The Au species are mainly dispersed as nanoclusters (triangle), as well as single atoms (square) and nanoparticles larger than 2 nm (circles).

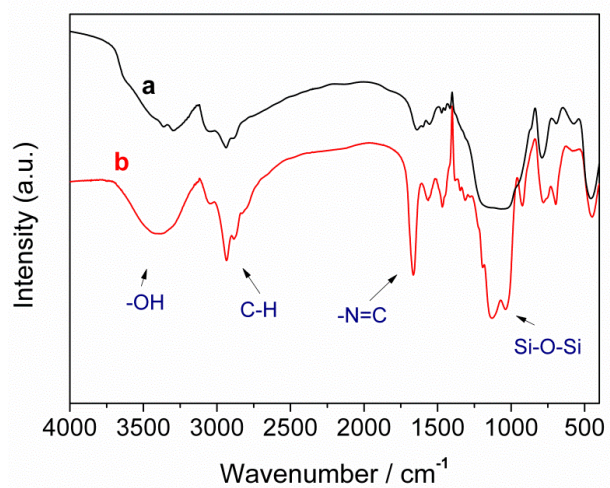

**Supplementary Figure 2. FTIR spectra of the functionalized gold catalysts. (a) Au/SiO<sub>2</sub>-NH<sub>2</sub> catalyst. (b) Au/SiO<sub>2</sub>-Schiff catalyst.**

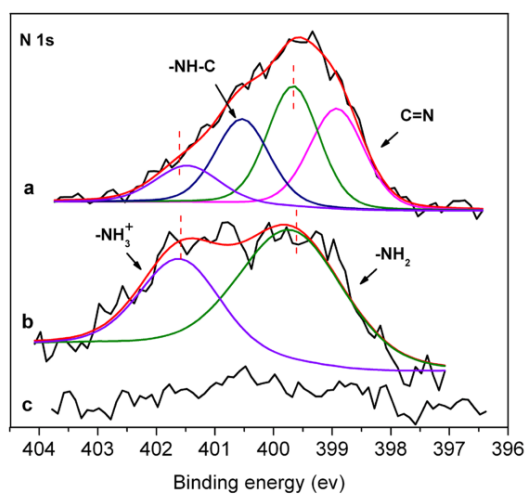

**Supplementary Figure 3. XPS spectra of the N 1s core levels of the as-prepared gold catalysts. (a) Au/SiO<sub>2</sub>-Schiff, (b) Au/SiO<sub>2</sub>-NH<sub>2</sub> and (c) unfunctionalized Au/SiO<sub>2</sub>.**

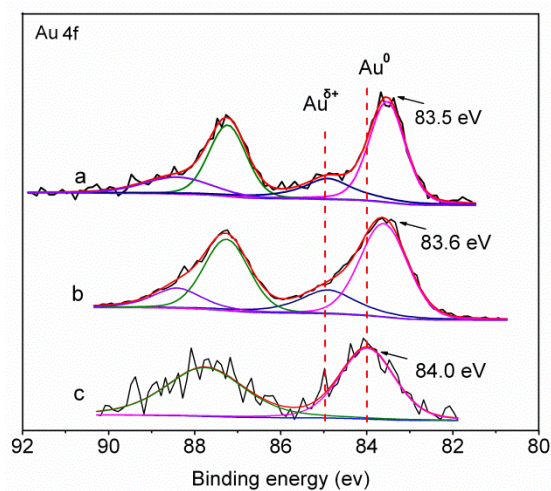

**Supplementary Figure 4. XPS spectra of the Au 4f core levels of the as-prepared gold catalysts. (a) Au/SiO<sub>2</sub>-NH<sub>2</sub>, (b) Au/SiO<sub>2</sub>-Schiff and, (c) unfunctionalized Au/SiO<sub>2</sub>. Besides metallic gold, both the functionalized samples contained some form of cationic Au species that were ascribed to sub-nanometric cationic Au clusters and isolated Au atoms.**

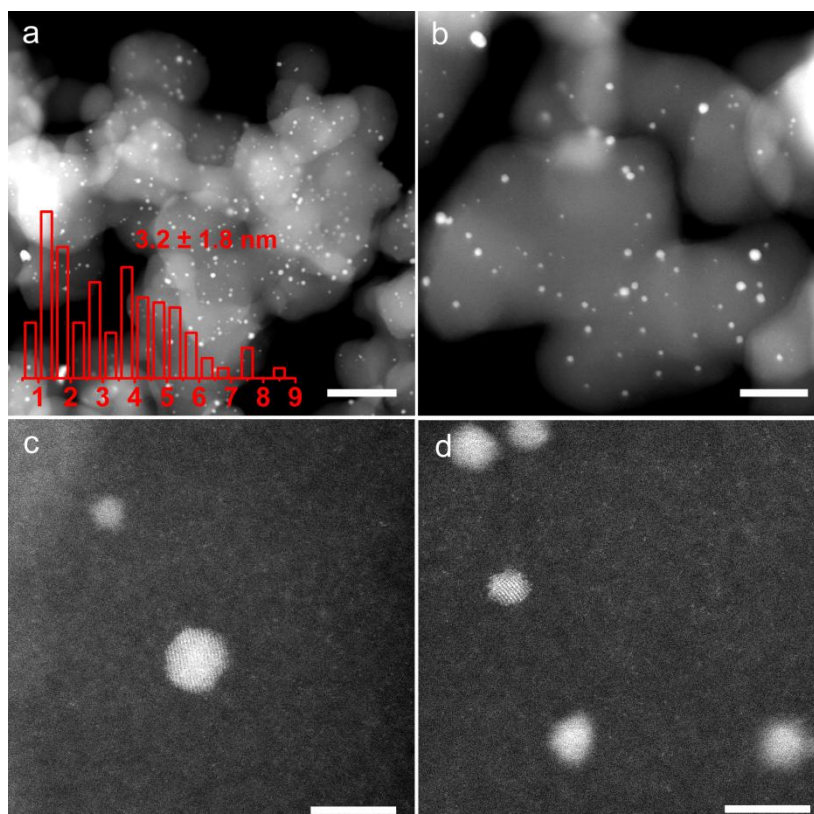

**Supplementary Figure 5. Typical HAADF-STEM images of Au/SiO<sub>2</sub>-Schiff catalyst prepared by *in situ* reduction method.** Scale bars in **a** represent 100 nm. Scale bars in **b** represent 50 nm. Scale bars in **c,d** represent 5 nm. The Au species are mainly dispersed as nanoparticles larger than 2 nm and some individual atoms.

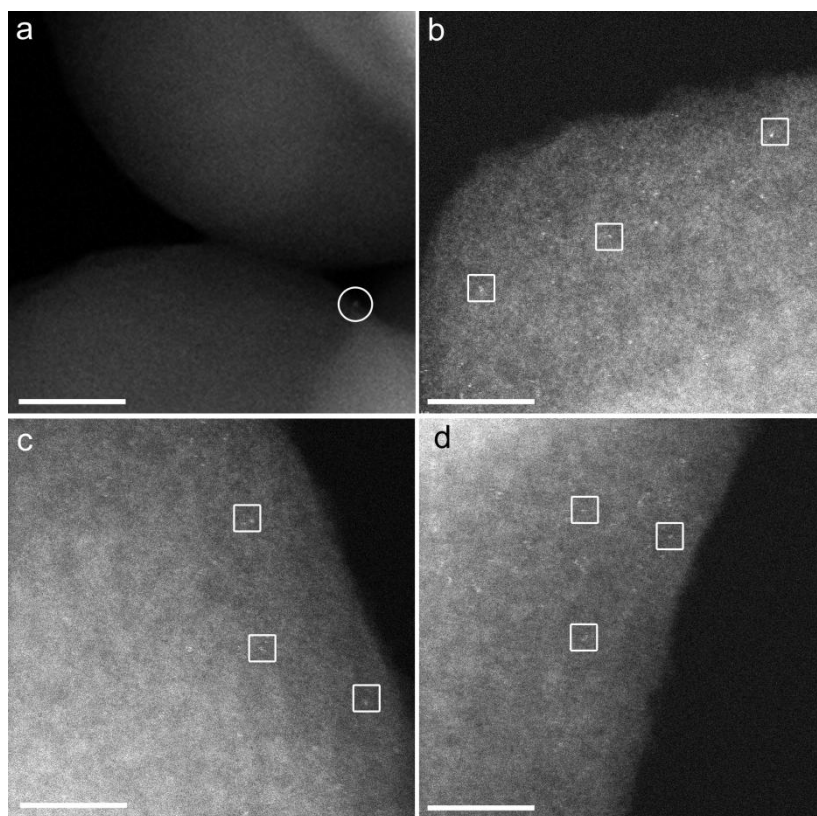

**Supplementary Figure 6. Typical HAADF-STEM images of Au/SiO<sub>2</sub>-Schiff catalyst prepared by the solid reduction method.** Scale bars in **a** represent 20 nm. Scale bars in **b**, **c** and **d** represent 5 nm. The figures showed that the Au species are mainly dispersed as single atoms (white squares), as well as some negligible nanoclusters (white circle).

|                                 |                                                                                   |                                                                                   |                                                                                   |                                                                                    |                                                                                     |
|---------------------------------|-----------------------------------------------------------------------------------|-----------------------------------------------------------------------------------|-----------------------------------------------------------------------------------|------------------------------------------------------------------------------------|-------------------------------------------------------------------------------------|
| <b>Adsorption patterns</b>      | 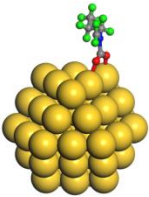 |  |  |  |  |
| $E_{ad}$ (eV)                   | <b>-0.40</b>                                                                      | <b>-0.38</b>                                                                      | <b>-0.23</b>                                                                      | <b>-0.29</b>                                                                       | <b>-0.24</b>                                                                        |
| $\nu_{C-O}$ (cm <sup>-1</sup> ) | <b>1701</b>                                                                       | <b>1767</b>                                                                       | <b>1752</b>                                                                       | <b>1741</b>                                                                        | <b>1757</b>                                                                         |

**Supplementary Figure 7. Theoretical understanding the chemisorption of CO<sub>2</sub> on the model of Au/SiO<sub>2</sub>-Schiff catalyst with an Au<sub>55</sub> cluster.** The simulation was performed with the program package DMol<sup>3</sup> in the Materials Studio of Accelrys Inc. Geometry with a closed packed Au<sub>55</sub> nanocluster (ca ~1.2 nm) and a silylation imine Schiff-base in COSMO of water was used to model the practical Au/SiO<sub>2</sub>-Schiff catalyst in water.



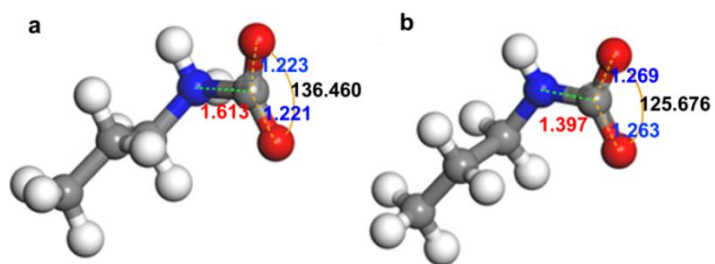

**Supplementary Figure 8. Activation patterns of CO<sub>2</sub> through carbamate zwitterion (a) or ionic carbamate (b) species.** The chemical interaction between CO<sub>2</sub> and propylamine is modelling with NWchem software at a B3LYP/def2-tzvp level.

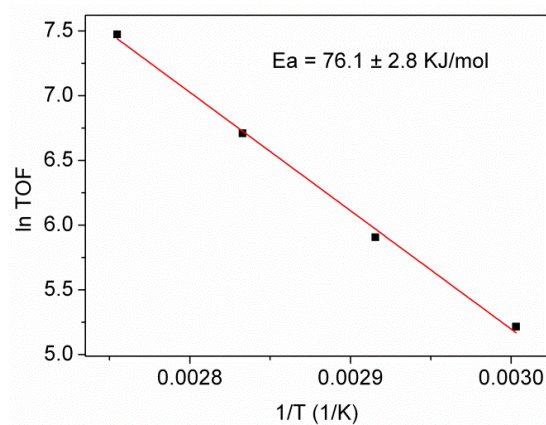

**Supplementary Figure 9. Arrhenius plot for Au/SiO<sub>2</sub>-Schiff catalyzed hydrogenation of CO<sub>2</sub> (lnTOF vs. 1/T).** Reaction conditions: 5.0 mg catalyst, 10 mL H<sub>2</sub>O-MeOH (20/80 v/v), 10 mmol NEt<sub>3</sub>,  $P(\text{H}_2)/P(\text{CO}_2) = 5.0/3.0 \text{ MPa}$ , 600 rpm.

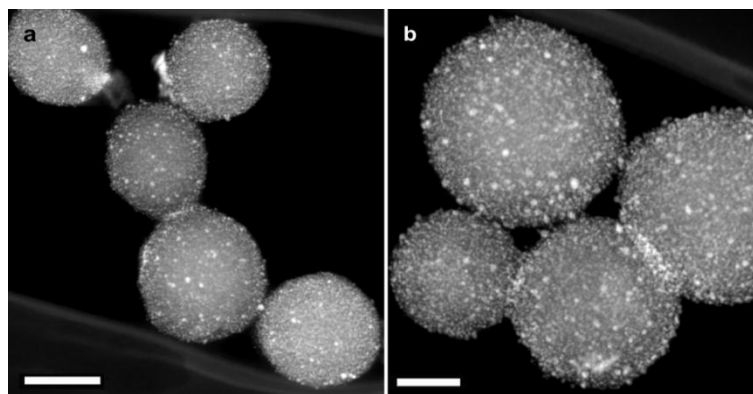

**Supplementary Figure 10. HAADF-STEM images of Au/SiO<sub>2</sub>-Schiff after catalytic hydrogenation of CO<sub>2</sub>. Scale bars in **a** represent 100 nm. Scale bars in **b** represent 50 nm.**

**Supplementary Table 1. Metal loadings and surface atomic ratios of the prepared catalysts.**

| Catalyst                                 | Metal loading <sup>a</sup><br>(wt.%) | atomic ratios (%) <sup>b</sup> |      |      |
|------------------------------------------|--------------------------------------|--------------------------------|------|------|
|                                          |                                      | C                              | Au   | N    |
| Au/SiO <sub>2</sub> -NH <sub>2</sub>     | 1.62                                 | 22.66                          | 0.39 | 3.38 |
| Au/SiO <sub>2</sub> -Schiff              | 1.41                                 | 51.57                          | 0.16 | 9.16 |
| Au/SiO <sub>2</sub> -Schiff <sup>c</sup> | 0.7                                  | 52.77                          | 0.10 | 7.51 |
| Au/SiO <sub>2</sub>                      | 1.50                                 | 21.95                          | 0.15 | 1.08 |

<sup>a</sup> The actual metal loading was measured by inductively coupled plasma mass spectrometry (ICP-AES).

<sup>b</sup> The atomic ratios were measured by XPS.

<sup>c</sup> The catalyst was prepared by *in situ* reduction method.

**Supplementary Table 2. Catalytic activity of the Au/SiO<sub>2</sub>-Schiff catalyst for CO<sub>2</sub> hydrogenation in water/methanol mixtures.<sup>a</sup>**

| Entry          | H <sub>2</sub> O/CH <sub>3</sub> OH<br>v/v (%) | P(H <sub>2</sub> /CO <sub>2</sub> )<br>MPa | Base             | Time<br>/h | HCOOH<br>/M | TON   |
|----------------|------------------------------------------------|--------------------------------------------|------------------|------------|-------------|-------|
| 1              | 0                                              | 5.0/3.0                                    | NEt <sub>3</sub> | 12         | 0.702       | 9806  |
| 2              | 5                                              | 5.0/3.0                                    | NEt <sub>3</sub> | 12         | 0.801       | 11189 |
| 3              | 10                                             | 5.0/3.0                                    | NEt <sub>3</sub> | 12         | 0.814       | 11370 |
| 4              | 20                                             | 5.0/3.0                                    | NEt <sub>3</sub> | 12         | 0.908       | 12684 |
| 5              | 40                                             | 5.0/3.0                                    | NEt <sub>3</sub> | 12         | 0.819       | 11440 |
| 6 <sup>b</sup> | 20                                             | 5.0/3.0                                    | NEt <sub>3</sub> | 12         | 0.518       | 14470 |

<sup>a</sup> Reaction conditions: 10 mg catalyst, 90 °C, 10 mL reagent, 15 mmol base, 600 rpm. [b] 5 mg Au/SiO<sub>2</sub>-Schiff.

**Supplementary Table 3. Catalytic activities for hydrogenation of CO<sub>2</sub> to formic acid catalyzed by recently reported heterogeneous and homogeneous catalysts.<sup>a</sup>**

| Catalyst                                                      | Temp.<br>/°C | Base                                                   | p(H <sub>2</sub> /CO <sub>2</sub> )<br>(MPa) | Time<br>/h | TON           | TOF <sup>c</sup><br>/h <sup>-1</sup> | Ref.             |
|---------------------------------------------------------------|--------------|--------------------------------------------------------|----------------------------------------------|------------|---------------|--------------------------------------|------------------|
| <b>Heterogeneous catalysts</b>                                |              |                                                        |                                              |            |               |                                      |                  |
| <b>Au/SiO<sub>2</sub>-Schiff</b>                              | <b>90</b>    | <b>NEt<sub>3</sub></b>                                 | <b>5/3</b>                                   | <b>12</b>  | <b>14,470</b> | <b>1,206</b>                         | <b>This work</b> |
| AUO <i>lite</i> <sup>b</sup>                                  | 40           | NEt <sub>3</sub>                                       | 9/9                                          | 37<br>days | 18,040        | 28                                   | 1                |
| Au NP/Al <sub>2</sub> O <sub>3</sub>                          | 70           | NEt <sub>3</sub>                                       | 2/2                                          | 20         | 215           | 10                                   | 2                |
| Au NP/TiO <sub>2</sub>                                        | 70           | NEt <sub>3</sub>                                       | 2/2                                          | 20         | 111           | 5.5                                  | 2                |
| Au NP/CeO <sub>2</sub>                                        | 70           | NEt <sub>3</sub>                                       | 2/2                                          | 20         | 8             | <1                                   | 2                |
| Pd/C <sub>3</sub> N <sub>4</sub>                              | 150          | NEt <sub>3</sub>                                       | 2.7/1.3                                      | 24         | 106           | 4.4                                  | 3                |
| bpy-CTF-[IrCp*Cl]Cl                                           | 120          | NEt <sub>3</sub>                                       | 4/4                                          | 2          | 5,000         | 2,500                                | 4                |
| IrPN/SBA-15                                                   | 60           | NEt <sub>3</sub>                                       | 2/2                                          | 20         | 2,700         | 135                                  | 5                |
| Ir(III)/COFs                                                  | 120          | NEt <sub>3</sub>                                       | 4/4                                          | 10         | 6,400         | 640                                  | 6                |
| Pd/r-GO                                                       | 100          | KHCO <sub>3</sub>                                      | 4/0                                          | 32         | 7,088         | 221                                  | 7                |
| Pd/C <sub>3</sub> N <sub>4</sub>                              | 60           | KHCO <sub>3</sub>                                      | 6/0                                          | 5          | 6,595         | 1,319                                | 8                |
| Ru/LDH (Mg <sup>2+</sup> /Al <sup>3+</sup> =5)                | 100          | NaOH                                                   | 1/1                                          | 24         | 698           | 29                                   | 9                |
| <b>Homogeneous catalysts</b>                                  |              |                                                        |                                              |            |               |                                      |                  |
| RhCl(PPh <sub>3</sub> ) <sub>3</sub>                          | 25           | NEt <sub>3</sub>                                       | 2/4                                          | 20         | 2,500         | 125                                  | 10               |
| RuCl(OAc)(PMe <sub>3</sub> ) <sub>4</sub>                     | 50           | NEt <sub>3</sub> /<br>C <sub>6</sub> F <sub>5</sub> OH | 7/12                                         | 0.33       | 32,000        | 95,000                               | 11               |
| [RuCl <sub>2</sub> (tppms) <sub>2</sub> ] <sub>2</sub>        | 50           | NaHCO <sub>3</sub>                                     | 1/0                                          | 6          | 180           | 50                                   | 12               |
| [RuCl <sub>2</sub> (C <sub>6</sub> H <sub>6</sub> )]/dppm     | 70           | NaHCO <sub>3</sub>                                     | 5/3.5                                        | 2          | 2,520         | 1,260                                | 13               |
| IrH <sub>3</sub> (P1)                                         | 120          | KOH                                                    | 4/4                                          | 48         | 3500,000      | 73,000                               | 14               |
| IrH <sub>3</sub> (P2)                                         | 185          | KOH                                                    | 2.8/2.8                                      | 24         | 348,000       | 14,500                               | 15               |
| Ru(P3)CO(H)                                                   | 200          | K <sub>2</sub> CO <sub>3</sub>                         | 3/1                                          | 48         | 23,000        | 2,200                                | 16               |
| [Rh(cod)(methallyl) <sub>2</sub> ]/<br>PBu <sub>4</sub> tppms | 50           | NEt <sub>3</sub>                                       | 5/5                                          | 20         | 310           | 630                                  | 17               |
| [RuCl <sub>2</sub> (P(OMe) <sub>3</sub> ) <sub>4</sub> ]      | 100          | DBU/<br>C <sub>6</sub> F <sub>5</sub> OH               | 7/10                                         | 4          | 6,630         | 1,660                                | 18               |
| [Cp*Ir(4DHBP)Cl] <sup>+</sup>                                 | 120          | KOH                                                    | 3/3                                          | 57         | 190,000       | (42,000)                             | 19               |
| [Cp*Ir(6DHBP)(OH <sub>2</sub> )] <sup>2+</sup>                | 120          | KHCO <sub>3</sub>                                      | 0.5/0.5                                      | 8          | 12,500        | (25,200)                             | 20               |
| [(Cp*IrCl) <sub>2</sub> (THBPM)] <sup>2+</sup>                | 50           | KHCO <sub>3</sub>                                      | 2/2                                          | 8          | 153,000       | (15,700)                             | 21               |
| [Cp*Ir(N1)(OH <sub>2</sub> )] <sup>2+</sup>                   | 80           | KHCO <sub>3</sub>                                      | 1.5/1.5                                      | 8          | 34,000        | (33,300)                             | 22               |
| IrI <sub>2</sub> (AcO)(bis-NHC)                               | 200          | KOH                                                    | 3/3                                          | 75         | 190,000       | 2,500                                | 23               |
| Fe(PNP <sup>Me</sup> -iPr)(H)(CO)(Br)                         | 80           | DBU                                                    | 0.4/0.4                                      | 21         | 10,275        | 489                                  | 24               |

<sup>a</sup> Abbreviations are the following: PC= bidentate iminophosphine ligand, dppm = 1,1-bis(diphenylphosphino)methane, cod = 1,5-cyclooctadiene, P1 = 2,6-bis(diisopropylphosphinomethyl)pyridine,

P2 = (diisopropylphosphinoethyl)amine, P3 = 6-(di-tertbutylphosphinomethylene)-2-(N,N-diethylaminomethyl)-1,6-dihydropyridine, N1 = 2,2',6,6'-tetrahydroxy-4,4'-bipyrimidine. PNP = 2,6-bis(di-tert-butylphosphinomethyl)pyridine. DBU= 1,8-Diazabicyclo[5.4.0]undec-7-ene. <sup>b</sup> commercial AUROLite (Mintek; 1 wt% Au/TiO<sub>2</sub>, extrudates). <sup>[c]</sup> The data in the parentheses are initial TOFs.

**Supplementary Table 4. Catalytic hydrogenation of CO<sub>2</sub> to formic acid by Au/SiO<sub>2</sub>-Schiff at different temperatures (60–90 °C).**

| Entry | Temp. /°C | Time /min | HCOOH/M | TOF  |
|-------|-----------|-----------|---------|------|
| 1     | 60        | 120       | 0.014   | 195  |
| 2     | 70        | 90        | 0.019   | 353  |
| 3     | 80        | 50        | 0.028   | 938  |
| 4     | 90        | 30        | 0.035   | 1950 |

Reaction conditions: 5.0 mg catalyst, 10 mL H<sub>2</sub>O-MeOH (20/80 v/v), 10 mmol NEt<sub>3</sub>,  $P(\text{H}_2)/P(\text{CO}_2) = 5.0/3.0$  MPa, 600 rpm.



**Supplementary Table 5. Hydrogenation of gaseous CO<sub>2</sub> by Au/SiO<sub>2</sub>-Schiff.**

| Entry | Base                                                                              | $P(\text{H}_2)/P(\text{CO}_2)$<br>MPa | HCOOH /M | TON  |
|-------|-----------------------------------------------------------------------------------|---------------------------------------|----------|------|
| 1     |  | 6.0/2.0                               | 0.29     | 8102 |
| 2     |  | 6.0/2.0                               | 0.23     | 6425 |
| 3     |  | 6.0/2.0                               | 0.15     | 4190 |
| 4     |  | 6.0/2.0                               | 0.067    | 1871 |
| 5     |  | 6.0/2.0                               | 0.08     | 2235 |

Reaction conditions: 5.0 mg catalyst, 90 °C, 10 mL H<sub>2</sub>O-MeOH (20/80 v/v), 10 mmol base, 6 h, 600 rpm.

**Supplementary Table 6. Reuse of the Au/ SiO<sub>2</sub>-Schiff catalyst for the hydrogenation of CO<sub>2</sub> to formic acid.**

| Cycle | HCOOH /M | TON   |
|-------|----------|-------|
| 1     | 0.908    | 12684 |
| 2     | 0.652    | 9107  |
| 3     | 0.424    | 5922  |

Reaction conditions: 10 mg catalyst, 90 °C, 10 mL reagent, 15 mmol base, 12 h, 600 rpm.

## Supplementary References:

- [1] Preti, D., Resta, C., Squarzialupi, S. & Fachinetti, G. Carbon dioxide hydrogenation to formic acid by using a heterogeneous gold catalyst. *Angew. Chem. Int. Ed.* **50**, 12551–12554 (2011).
- [2] Filonenko, G. A., Vrijburg, W. L., Hensen, E. J. & Pidko, E. A. On the activity of supported Au catalysts in the liquid phase hydrogenation of CO<sub>2</sub> to formates. *J. Catal.* **343**, 97–105 (2016).
- [3] Lee, J. H. *et al.* Carbon dioxide mediated, reversible chemical hydrogen storage using a Pd nanocatalyst supported on mesoporous graphitic carbon nitride. *J. Mater. Chem. A* **2**, 9490–9495 (2014).
- [4] Park, K., Gunasekar, G. H., Prakash, N., Jung, K. D. & Yoon, S. A highly efficient heterogenized iridium complex for the catalytic hydrogenation of carbon dioxide to formate. *ChemSusChem* **8**, 3410–3413 (2015).
- [5] Xu, Z., McNamara, N. D., Neumann, G. T., Schneider, W. F. & Hicks, J. C. Catalytic hydrogenation of CO<sub>2</sub> to formic acid with silica-tethered iridium catalysts. *ChemCatChem* **5**, 1769–1771 (2013).
- [6] Hariyanandam, G. G., Hyun, D., Natarajan, P., Jung, K. D. & Yoon, S. An effective heterogeneous Ir (III) catalyst, immobilized on a heptazine-based organic framework, for the hydrogenation of CO<sub>2</sub> to formate. *Catal. Today* **265**, 52–55 (2016).
- [7] Bi, Q. Y., Lin, J. D., Liu, Y. M., Du, X. L., Wang, J. Q., He, H. Y. & Cao, Y. An aqueous rechargeable formate-based hydrogen battery driven by heterogeneous Pd catalysis. *Angew. Chem. Int. Ed.* **53**, 13583–13587 (2014).
- [8] Shao, X., Xu, J., Huang, Y., Su, X., Duan, H., Wang, X. & Zhang, T. Pd@ C<sub>3</sub>N<sub>4</sub> nanocatalyst for highly efficient hydrogen storage system based on potassium bicarbonate/formate. *AIChE J.* **62**, 2410–2418 (2016).
- [9] Mori, K., Taga, T. & Yamashita, H. Isolated single-atomic Ru catalyst bound on a layered double hydroxide for hydrogenation of CO<sub>2</sub> to formic acid. *ACS Catal.* **7**, 3147–3151 (2017).
- [10] Ezhova, N. N., Kolesnichenko, N. V., Bulygin, A. V., Slivinskii, E. V. & Han, S. Hydrogenation of CO<sub>2</sub> to formic acid in the presence of the Wilkinson complex. *Russ. Chem. Bull.* **51**, 2165–2169 (2002).
- [11] Munshi, P., Main, A. D., Linehan, J. C., Tai, C. C. & Jessop, P. G. Hydrogenation of carbon dioxide catalyzed by ruthenium trimethylphosphine complexes: The accelerating effect of certain alcohols and amines. *J. Am. Chem. Soc.* **124**, 7963–7971 (2002).
- [12] Elek, J., Nádasdi, L., Papp, G., Laurency, G. & Joó, F. Homogeneous hydrogenation of carbon dioxide and bicarbonate in aqueous solution catalyzed by water-soluble ruthenium(II) phosphine complexes. *Appl. Catal. A Gen.* **255**, 59–67 (2003).
- [13] Federsel, C., Jackstell, R., Boddien, A., Laurency, G. & Beller, M. Ruthenium-catalyzed hydrogenation of bicarbonate in water. *ChemSusChem* **3**, 1048–1050 (2010).
- [14] Tanaka, R., Yamashita, M. & Nozaki, K. Catalytic hydrogenation of carbon dioxide using Ir(III)-pincer complexes. *J. Am. Chem. Soc.* **131**, 14168–14169 (2009).
- [15] Schmeier, T. J., Dobereiner, G. E., Crabtree, R. H. & Hazari, N. Secondary coordination sphere interactions facilitate the insertion step in an Iridium(III) CO<sub>2</sub> reduction catalyst. *J. Am. Chem. Soc.*, **133**, 9274–9277 (2011).
- [16] Huff, C. A. & Sanford, M. S. Catalytic CO<sub>2</sub> hydrogenation to formate by a ruthenium pincer complex. *ACS Catal.* **3**, 2412–2416 (2013).
- [17] Wesselbaum, S., Hintermair, U. & Leitner, W. Continuous-flow hydrogenation of carbon dioxide to pure formic acid using an integrated scCO<sub>2</sub> process with immobilized catalyst and base. *Angew. Chem., Int. Ed.* **51**, 8585–8588 (2012).
- [18] Muller, K., Sun, Y. & Thiel, W. R. Ruthenium(II) phosphite complexes as catalysts for the hydrogenation of carbon dioxide. *ChemCatChem* **5**, 1340–1343 (2013).
- [19] Himeda, Y., Onozawa-Komatsuzaki, N., Sugihara, H. & Kasuga, K. Simultaneous tuning of activity and water

- solubility of complex catalysts by acid-base equilibrium of ligands for conversion of carbon dioxide. *Organometallics* **26**, 702–712 (2007).
- [20] Wang, W. H., Hull, J. F., Muckerman, J. T., Fujita, E. & Himeda, Y. Second-coordination-sphere and electronic effects enhance iridium(III)-catalyzed homogeneous hydrogenation of carbon dioxide in water near ambient temperature and pressure. *Energy Environ. Sci.* **5**, 7923–7926 (2012).
- [21] Hull, J. F., Himeda, Y., Wang, W. H., Hashiguchi, B., Periana, R., Szalda, D. J., Muckerman, J. T. & Fujita, E. Reversible hydrogen storage using CO<sub>2</sub> and a proton-switchable iridium catalyst in aqueous media under mild temperatures and pressures. *Nat. Chem.* **4**, 383–388 (2012).
- [22] Wang, W. H., Muckerman, J. T., Fujita, E. & Himeda, Y. Mechanistic insight through factors controlling effective hydrogenation of CO<sub>2</sub> catalyzed by bioinspired proton-responsive Iridium(III) complexes. *ACS Catal.* **3**, 856–860 (2013).
- [23] Azua, A., Sanz, S. & Peris, E. Water-soluble Ir(III) N-heterocyclic carbene based catalysts for the reduction of CO<sub>2</sub> to formate by transfer hydrogenation and the deuteration of aryl amines in water. *Chem. Eur. J.* **17**, 3963–3967 (2011).
- [24] Bertini, F., Gorgas, N., Stöger, B., Peruzzini, M., Veiros, L. F., Kirchner, K. & Gonsalvi, L. Efficient and mild carbon dioxide hydrogenation to formate catalyzed by Fe(II) hydrido carbonyl complexes bearing 2,6-(diaminopyridyl) diphosphine pincer ligands. *ACS Catal.* **6**, 2889–2893 (2016).
